# Supplementary material for: A novel trigonal bipyramidal cage-based Zn(ii)-MOF featuring two types of trinuclear clusters with high gas sorption properties
Source: Royal Society of Chemistry journal article supplement (doi:10.1039/d2ce01399a), 2022-01-01
Supplement: d2ce01399a1.pdf [file d2ce01399a1.pdf]

*Electronic Supplementary Information*

**A novel trigonal bipyramidal cage-based Zn(II)-MOF  
featuring two types of trinuclear clusters with high gas  
sorption properties**

Hai-Yu Duan<sup>a</sup>, Xiu-Yuan Li<sup>a,\*</sup>, Chen-Xu Zhang<sup>b</sup>, Chaozheng He<sup>a</sup>

<sup>a</sup>Shaanxi Key Laboratory of Optoelectronic Functional Materials and Devices, School of Materials Science and Chemical Engineering, Xi'an Technological University, Xi'an, 710021, P. R. China

<sup>b</sup>Department of Medical Equipment and Metrology, School of Biomedical Engineering, Air Force Medical University, Xi'an, 710032, P. R. China

\*To whom correspondence should be addressed. E-mail: lixiuyuan@xatu.edu.cn.

**Table S1** Selected bond distances (Å) and angles (°) for **1**.

|              |           |               |           |
|--------------|-----------|---------------|-----------|
| Zn(1)-O(5)   | 1.952(11) | Zn(1)-O(13)   | 1.70(3)   |
| Zn(2)-O(2)   | 2.137(10) | Zn(2)-O(4)    | 2.148(11) |
| Zn(3)-O(8)   | 1.962(11) | Zn(3)-O(12)   | 1.999(12) |
| Zn(4)-O(3)#1 | 2.011(9)  | Zn(4)-O(6)    | 1.937(12) |
| Zn(4)-O(9)#2 | 2.186(17) | Zn(4)-O(10)#2 | 2.167(18) |
| Zn(4)-O(11)  | 2.011(5)  |               |           |

Symmetry transformations used to generate equivalent atoms: #1 -x+y,-x+1,z; #2 -y+1,x-y+1,z

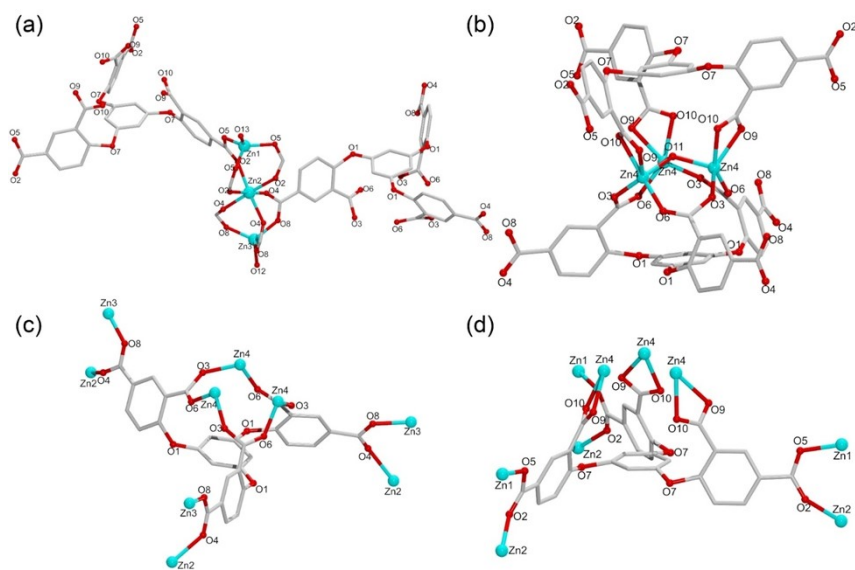

**Fig. S1.** (a), (b) Coordination environments of  $\text{Zn}^{2+}$  ions in **1**; (c), (d) Coordination modes of  $\text{H}_2\text{tdpb}$  in **1**.

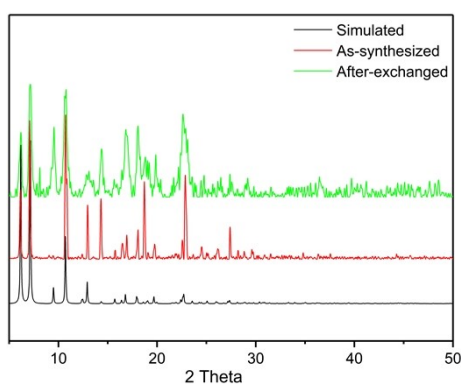

**Fig. S2.** PXRD patterns for as-synthesized and after-exchanged of **1**

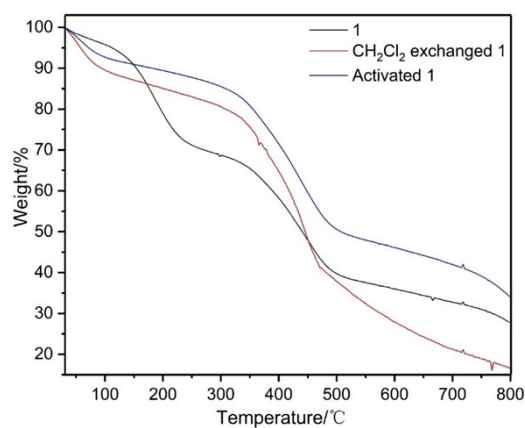

**Fig. S3.** TGA curves for as-synthesized, after  $\text{CH}_2\text{Cl}_2$  exchanged and desolvated samples of **1**.

### Calculation of Sorption Heat Using Virial 2 Model

$$\ln P = \ln N + 1/T \sum_{i=0}^m a_i N^i + \sum_{i=0}^n b_i N^i \quad Q_{st} = -R \sum_{i=0}^m a_i N^i$$

The above virial expression was used to fit the combined isotherm data for **1a** at 273.15 and 298 K, where  $P$  is the pressure,  $N$  is the adsorbed amount,  $T$  is the temperature,  $a_i$  and  $b_i$  are virial coefficients, and  $m$  and  $N$  are the number of coefficients used to describe the isotherms.  $Q_{st}$  is the coverage-dependent enthalpy of adsorption and  $R$  is the universal gas constant.

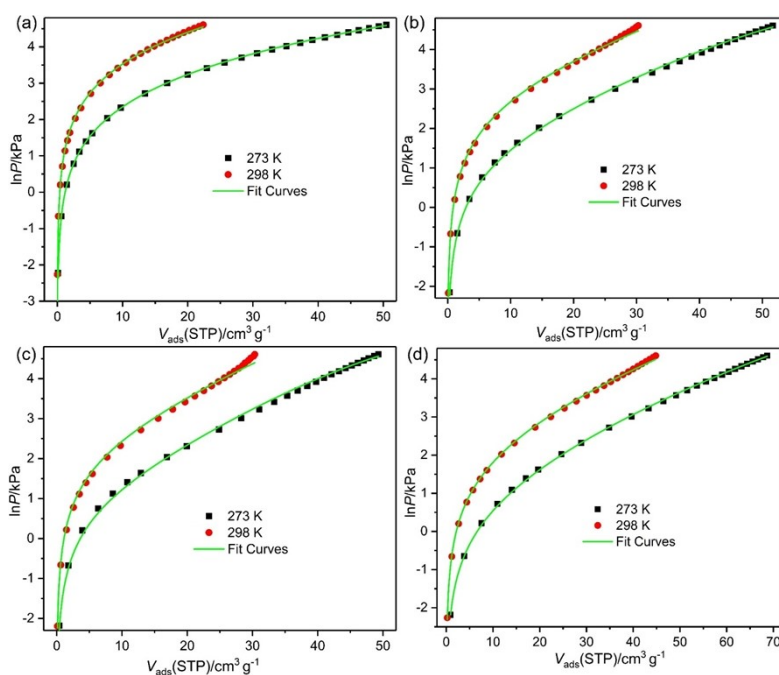

**Fig. S4.** (a) CO<sub>2</sub>, (b) C<sub>2</sub>H<sub>4</sub>, (c) C<sub>2</sub>H<sub>6</sub> and (d) C<sub>2</sub>H<sub>2</sub> adsorption isotherms of **1a** with fitting by Virial 2 model.

**Table S2** Parameters obtained from the Virial 2 model fitting of the single-component adsorption isotherms at 273.15 and 298 K.

|           | CO <sub>2</sub> | C <sub>2</sub> H <sub>4</sub> | C <sub>2</sub> H <sub>6</sub> | C <sub>2</sub> H <sub>2</sub> |
|-----------|-----------------|-------------------------------|-------------------------------|-------------------------------|
| <b>a0</b> | -3926.41893     | -4101.64865                   | -4050.16909                   | -4252.29504                   |
| <b>a1</b> | 7.42318         | 6.45919                       | 4.82542                       | 10.15691                      |
| <b>a2</b> | -0.07727        | 0.15183                       | 0.31531                       | 0.01383                       |
| <b>a3</b> | 4.62531E-4      | -0.00186                      | -0.00376                      | -2.4707E-4                    |

|                        |          |           |           |           |
|------------------------|----------|-----------|-----------|-----------|
| <b>b0</b>              | 14.17647 | 13.87906  | 13.46542  | 13.43283  |
| <b>Chi<sup>2</sup></b> | 0.1063   | 3.291E-03 | 6.984E-03 | 1.396E-03 |
| <b>R<sup>2</sup></b>   | 0.969    | 0.999     | 0.998     | 1.000     |

### Gas Selectivity Prediction via IAST

The experimental isotherm data for pure CO<sub>2</sub>, C<sub>2</sub>-hydrocarbon and CH<sub>4</sub> were fitted using a dual Langmuir-Freundlich (L-F) model:

$$q = \frac{a_1 * b_1 * p^{c1}}{1 + b_1 * p^{c1}} + \frac{a_2 * b_2 * p^{c2}}{1 + b_2 * p^{c2}}$$

Where  $q$  and  $P$  are adsorbed amounts and the pressure of component  $i$ , respectively.

The adsorption selectivities for binary mixtures defined by

$$S_{i/j} = \frac{x_i * y_j}{x_j * y_i}$$

were respectively calculated using IAST. Where  $x_i$  is the mole fraction of component  $i$  in the adsorbed phase and  $y_i$  is the mole fraction of component  $i$  in the bulk.

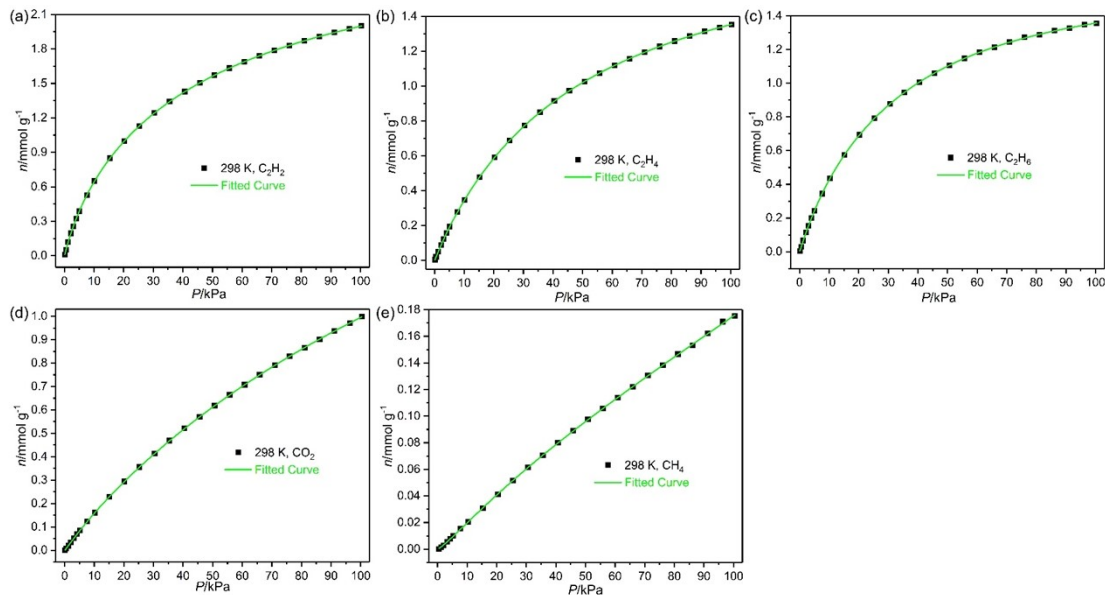

**Fig. S5.** Adsorption isotherms of **1a** fitting by dual L-F model.

**Table S3** Parameters obtained from the dual Langmuir-Freundlich fitting of the single-

component adsorption isotherms.

| <b>298 K</b>           | <b>C<sub>2</sub>H<sub>2</sub></b> | <b>C<sub>2</sub>H<sub>4</sub></b> | <b>C<sub>2</sub>H<sub>6</sub></b> | <b>CO<sub>2</sub></b> | <b>CH<sub>4</sub></b> |
|------------------------|-----------------------------------|-----------------------------------|-----------------------------------|-----------------------|-----------------------|
| <b>a1</b>              | 2.53441                           | 0.07133                           | 1.42154                           | 0.08772               | 0.10139               |
| <b>b1</b>              | 0.02275                           | 0.17963                           | 0.0386                            | 0.05646               | 0.01063               |
| <b>c1</b>              | 0.93846                           | 1.05235                           | 1.02982                           | 1.11408               | 1.1718                |
| <b>a2</b>              | 0.4338                            | 1.88344                           | 0.23904                           | 2.67742               | 9.75501               |
| <b>b2</b>              | 0.10708                           | 0.0163                            | 4.61321E-4                        | 0.00435               | 3.48725E-5            |
| <b>c2</b>              | 1.00332                           | 1.0594                            | 2.00164                           | 1.03871               | 1.24556               |
| <b>Chi<sup>2</sup></b> | 1.630E-6                          | 7.417E-7                          | 3.005E-6                          | 5.351E-7              | 2.391E-7              |
| <b>R<sup>2</sup></b>   | 1.000                             | 1.000                             | 1.000                             | 1.000                 | 1.000                 |
